# Supplementary material for: Waste bamboo-derived magnetically separable bamboo-activated carbon: from characterization to effective remediation of fluoride (F − ) ions from water
Source: Royal Society of Chemistry journal article supplement (doi:10.1039/d4ra03752a), 2024-01-01
Supplement: d4ra03752a1.pdf [file d4ra03752a1.pdf]

## Waste Bamboo Derived Magnetically Separable Bamboo Activated Carbon: From Characterization to Effective Remediation of fluoride (F<sup>-</sup>) ions from water

Yana Bagbi<sup>1\*</sup>, Pokjum Yomgam<sup>1,3</sup>, Eruk Libang<sup>1,3</sup>, Bijoylakshmi Boruah<sup>1,4</sup>, Jaspreet Kaur<sup>2</sup>, S. Jayanthi<sup>4</sup>, Sanjeev Kumar<sup>3</sup>, Narender K Dhanial<sup>2\*</sup>

<sup>1</sup>Department of Physics & Astrophysics, University of Delhi-110007, India

<sup>2</sup>Department of Zoology, Faculty of Sciences, University of Delhi-110007, India

<sup>3</sup>Department of Physics, Rajiv Gandhi University, Doimukh, Arunachal Pradesh-791109, India

<sup>4</sup>Department of Physics, Jawaharlal Nehru College, Pasighat, Arunachal Pradesh-791103, India

\*Corresponding author email: [yanabagbi@gmail.com](mailto:yanabagbi@gmail.com), [narender@zoology.du.ac.in](mailto:narender@zoology.du.ac.in)

### Supplementary Files

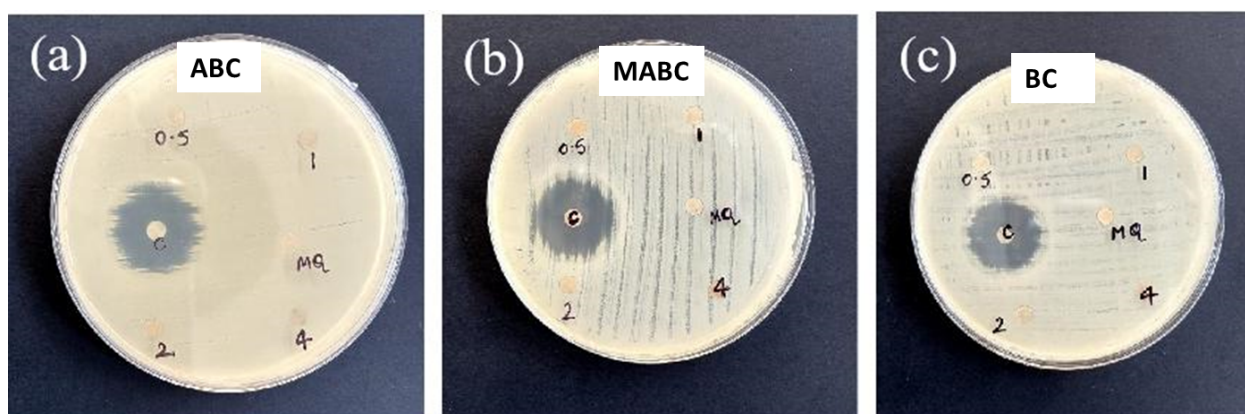

**Fig. S1 (a-c):** Agar disk diffusion method for the antimicrobial property of (a) Activated bamboo carbon (ABC), (b) Magnetite-activated bamboo carbon (MABC) & (c) Bamboo carbon (BC).

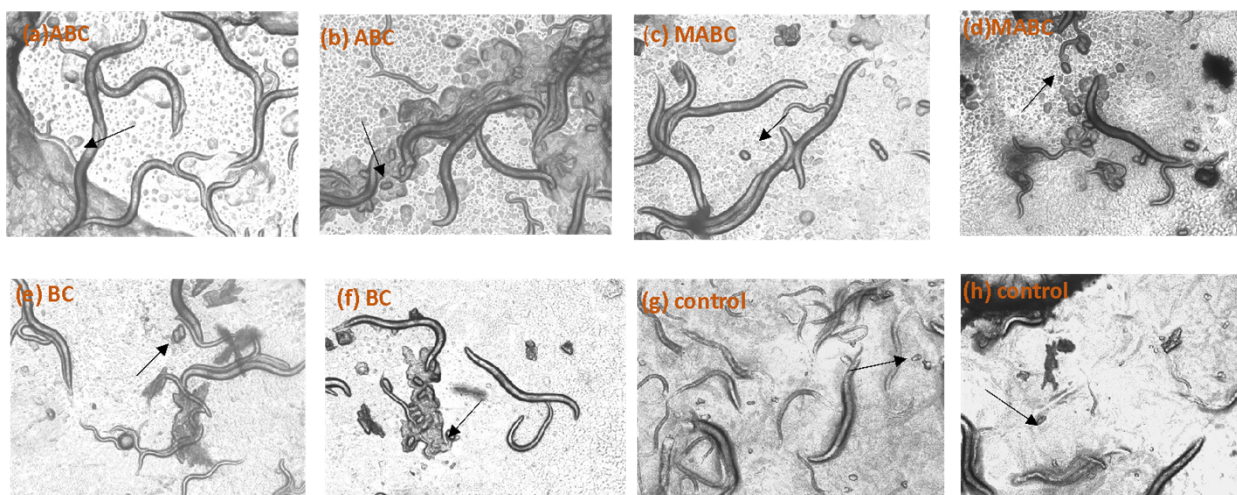

**Fig. S2 (a-h):** Cytotoxicity analysis of ABC (a, b), MABC (c, d) & BC (e, f) against *C. elegans* (arrows indicating eggs) compared with the control group without nanoparticles treatment (g, h).
